# Supplementary material for: Pharmacogenetic Dose Modeling Based on CYP2C19 Allelic Phenotypes
Source: Pharmaceutics. 2022 Dec 16;14(12):2833. doi: 10.3390/pharmaceutics14122833 (PMC9781550; doi:10.3390/pharmaceutics14122833)
Supplement: Supplementary file 1 [file pharmaceutics-14-02833-s001.zip]

Archive with 4 entries (4 files):
- SupplFile S1.txt
- SupplFile S2.pdf
- SupplFile S3.pdf
- SupplFile S4.zip
