# Supplementary material for: Pharmacogenetic Dose Modeling Based on CYP2C19 Allelic Phenotypes
Source: Pharmaceutics. 2022 Dec 16;14(12):2833. doi: 10.3390/pharmaceutics14122833 (PMC9781550; doi:10.3390/pharmaceutics14122833)
Supplement: Supplementary file 1 [file pharmaceutics-14-02833-s001.zip › SupplFile S1.txt]

StudyID	Adjustment_EM	Adjustment_IM	Adjustment_PM	Adjustment_RM	Adjustment_UM	Size_EM	Size_IM	Size_PM	Size_RM	Size_UM	Class	Substance	Parameter	Dosage	EM_17	EM_2	IM_17	IM_11	IM_22	RM_1717	RM_11	Participants	Study	Status
1	104	94	59	NA	NA	4	19	7	NA	NA	TA	Ami	Css	MD	1	0	1	0	0	0	0	P	Shimoda_2002	OK
2	109	82	NA	NA	NA	11	9	NA	NA	NA	TA	Ami	Css	MD	1	0	1	0	0	0	0	P	Steimer_2004	OK
3	98	98	92	NA	NA	4	2	6	NA	NA	TA	Ami	Auc	SD	1	0	1	0	0	0	0	H	Jiang_2002	OK
4	109	NA	53	NA	NA	11	NA	1	NA	NA	TA	Ami	Css	MD	1	0	1	0	0	0	0	P	Baumann_1986	OK
5	96	81	71	132	176	30	19	3	29	5	TA	Ami	Css	MD	0	0	1	0	0	0	0	P	de_Vos_2011	OK
45	101	NA	61	NA	NA	6	NA	6	NA	NA	TA	Ami	Auc	SD	1	0	1	0	0	0	0	H	Ryu_2017	OK
46	105	89	79	106	NA	16	7	1	10	NA	TA	Ami	Auc	SD	0	0	0	0	0	0	0	H	Matthei_2021	OK
6	110	79	62	NA	NA	18	25	8	NA	NA	TA	Clomi	Css	MD	1	0	1	0	0	0	0	P	Yokono_2001	OK
7	106	NA	71	NA	NA	19	NA	6	NA	NA	TA	Clomi	1-Cl	SD	1	1	0	0	0	0	0	H	Nielsen_1994	OK
8	110	89	68	95	102	70	27	3	47	4	TA	Clomi	Css-D	MD	0	0	1	0	0	0	0	P	de_Vos_2011	OK
9	105	91	48	NA	NA	8	7	7	NA	NA	TA	Doxe	1-Cl	SD	1	0	1	0	0	0	0	H	Kirchheiner_2002	OK
10	105	NA	77	NA	NA	11	NA	5	NA	NA	TA	Imi	1-Cl	SD	1	0	1	0	0	0	0	H	Skjelbo_1991	OK
11	105	NA	75	NA	NA	5	NA	5	NA	NA	TA	Imi	Css	MD	1	0	1	0	0	0	0	P	Morinobu_1997	OK
12	108	NA	58	NA	NA	5	NA	23	NA	NA	TA	Imi	Css	MD	1	0	1	0	0	0	0	P	Koyama_1996	OK
13	104	80	68	120	145	65	32	5	52	11	TA	Imi	Css-D	MD	0	0	0	0	0	0	0	P	Schenk_2010	OK
14	114	NA	31	NA	NA	25	NA	1	NA	NA	TA	Trimi	Css	MD	1	0	1	0	0	0	0	P	Eap_2000	OK
15	100	79	58	NA	NA	8	7	7	NA	NA	TA	Trimi	1-Cl	SD	1	0	1	0	0	0	0	H	Kirchheiner_2003	OK
16	108	NA	61	NA	NA	10	NA	6	NA	NA	SSRI	Cita	Auc	MD	1	1	0	0	0	0	0	H	Sindrup_1993	OK
17	108	78	48	112	148	96	35	4	49	13	SSRI	Cita	Css-D	MD	0	0	1	0	0	0	0	P	de_Vos_2011	OK
18	103	97	67	NA	NA	26	7	2	NA	NA	SSRI	Cita	Cl	SD	1	0	1	0	0	0	0	H	Fudio_2011	OK
19	100	46	NA	NA	NA	23	17	NA	NA	NA	SSRI	Cita	Css	MD	1	0	1	0	0	0	0	P	Rudberg_2006	OK
20	104	93	67	209	NA	70	38	4	11	NA	SSRI	Escita	Css	MD	0	0	1	0	0	1	0	P	Huezo-Diaz_2010	OK
21	110	NA	54	NA	NA	8	NA	5	NA	NA	SSRI	Escita	Cl	SD	1	1	0	0	0	0	0	H	Noehr-Hensen_2002	OK
22	108	NA	58	NA	NA	8	NA	5	NA	NA	SSRI	Escita	Cl	MD	1	1	0	0	0	0	0	H	Noehr-Hensen_2002	OK
23	100	NA	NA	NA	126	11	NA	NA	NA	5	SSRI	Escita	Auc	SD	0	0	0	0	0	0	0	H	Ohlsson_2008	OK
24	112	59	20	129	220	60	34	6	43	7	SSRI	Escita	Css	MD	0	0	0	0	0	0	0	P	Rudberg_2008	OK
25	100	39	NA	NA	NA	27	16	NA	NA	NA	SSRI	Escita	Css	MD	1	0	1	0	0	0	0	P	Rudberg_2006	OK
47	118	63	42	118	109	143	132	8	143	15	SSRI	Escita	Css	MD	1	0	1	0	0	0	1	P	Faraj_2022	OK
49	110	77	NA	NA	NA	71	56	NA	NA	NA	SSRI	Escita	Css	MD	0	0	0	0	1	1	0	P	Islam_2022	OK
50	108	73	43	125	130	178	118	33	138	46	SSRI	Escita	Css	MD	0	0	0	0	0	0	0	P	Braten_2022	OK
51	106	88	61	NA	NA	144	235	43	NA	NA	SSRI	Escita	Css	MD	1	0	1	0	0	0	0	P	Tsuchimine_2018	OK
52	111	70	34	123	151	837	437	88	507	97	SSRI	Escita	Css	MD	0	0	0	0	0	0	0	P	Jukic_2018	OK
53	115	76	57	100	NA	24	9	1	16	NA	SSRI	Escita	MR	MD	0	0	0	0	0	0	0	P	Uckun_2015	OK
27	101	NA	93	NA	NA	9	NA	4	NA	NA	SSRI	Fluvox	Auc	SD	1	0	1	0	0	0	0	H	Jan_et_al_2002	NoSubstrate
28	105	NA	75	NA	NA	6	NA	6	NA	NA	SSRI	Sertr	Auc	SD	1	0	1	0	0	0	0	H	Wang_2001	OK
29	113	79	37	103	115	42	22	5	40	5	SSRI	Sertr	Cl	MD	0	0	0	0	0	0	0	P	Rudberg_2008	OK
54	107	78	40	120	NA	495	321	35	351	NA	SSRI	Sertr	Css	MD	0	0	1	0	0	1	0	P	Braten_2020	OK
55	101	73	NA	138	NA	28	9	NA	9	NA	SSRI	Sertr	Auc	SD	0	0	0	0	0	1	0	H	Saiz-Rodriguez_2018	OK
32	112	NA	42	NA	NA	8	NA	7	NA	NA	Moclo	Moclo	1-Cl	SD	1	1	0	0	0	0	0	H	Gram_1995	OK
33	107	NA	65	NA	NA	8	NA	7	NA	NA	Moclo	Moclo	1-Cl	MD	1	1	0	0	0	0	0	H	Gram_1995	OK
34	108	85	56	NA	NA	36	17	2	NA	NA	SSRI	Venla	Css	MD	1	0	1	0	0	0	0	P	McAlpine_2010	OK
35	105	94	32	NA	NA	31	6	3	NA	NA	SSRI	Venla	Css	MD	1	0	1	0	0	0	0	P	McAlpine_2010	OK
56	104	86	54	123	146	102	69	10	61	13	SSRI	Venla	Css	MD	0	0	0	0	0	0	0	P	Scherf-Clavel_2022	OK
57	106	87	79	106	112	184	224	12	183	38	SSRI	Venla	Css	MD	1	0	1	0	0	0	1	P	Kringen_2020	OK
36	104	NA	78	NA	NA	10	NA	5	NA	NA	Cloza	Cloza	Auc	SD	1	1	0	0	0	0	0	H	Dahl_1994	OK
37	106	91	46	121	NA	24	17	4	24	NA	Cloza	Cloza	Css	MD	0	0	0	0	0	1	0	P	Jaquenot_2009	OK
58	101	98	NA	NA	NA	38	13	NA	NA	NA	Cloza	Cloza	Css	MD	1	0	1	0	0	0	0	P	Amman_2021	OK
38	104	NA	82	NA	NA	7	NA	7	NA	NA	Zote	Zote	1-Cl	SD	1	1	0	0	0	0	0	H	Kondo_1996	OK
39	121	89	45	NA	NA	5	7	9	NA	NA	Benzo	Etizo	Auc	SD	1	0	1	0	0	0	0	H	Fukasawa_2005	OK
40	109	NA	51	NA	NA	13	NA	3	NA	NA	Benzo	Diaz	Cl	SD	1	1	0	0	0	0	0	H	Bertillsson_1989	OK
41	100	100	100	NA	NA	4	4	6	NA	NA	SSRI	Fluox	Auc	SD	1	0	1	0	0	0	0	H	Liu_2001	NoSubstrate
42	99	102	120	NA	NA	67	23	2	NA	NA	SSRI	Fluox	Css	MD	1	0	1	0	0	0	0	P	Scordo_2005	NoSubstrate
43	100	NA	100	NA	NA	78	NA	2	NA	NA	Mapro	Mapro	Css	MD	1	1	0	0	0	0	0	P	Gabris_1985	NoSubstrate
44	92	NA	142	NA	NA	10	NA	5	NA	NA	Mians	Mians	Auc	SD	1	1	0	0	0	0	0	H	Dahl_1994	NoSubstrate
